# Supplementary material for: Synthetic ionophores as non-resistant antibiotic adjuvants
Source: Royal Society of Chemistry journal article supplement (doi:10.1039/c8ra07641c), 2019-01-01
Supplement: c8ra07641c1.pdf [file c8ra07641c1.pdf]

## Synthetic Ionophores as Non-Resistant Antibiotic Adjuvants

Mohit B. Patel,<sup>‡</sup> Evan Garrad,<sup>‡</sup> Joseph W. Meisel,<sup>†</sup> Saeedeh Negin,<sup>†</sup> Michael R. Gokel,<sup>†</sup> and  
George W. Gokel<sup>†\*</sup>

<sup>†</sup> Departments of Chemistry & Biochemistry University of Missouri – St. Louis, 1 University  
Blvd., St. Louis, MO 63121 U. S. A.

<sup>‡</sup> Department of Biology, University of Missouri – St. Louis, 1 University Blvd., St. Louis, MO  
63121 U. S. A.

\* Corresponding Author

G. W. Gokel

Department of Chemistry & Biochemistry

University of Missouri-St. Louis

St. Louis, MO 63121 USA

Tel. 314/516-5321

Fax 314/516-5342

E-mail: [gokelg@umsl.edu](mailto:gokelg@umsl.edu)

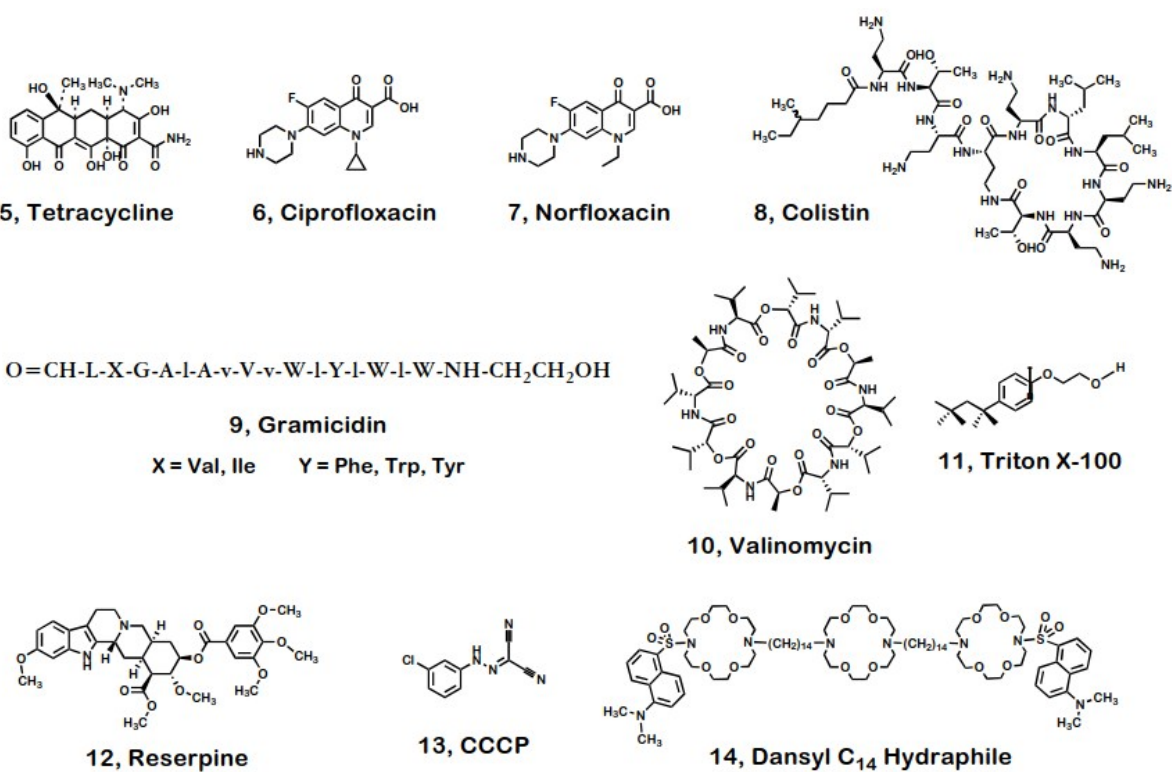

**Figure S1.** Structures of antibiotics and controls used for the study. The antibiotics studied were tetracycline (5), ciprofloxacin (6), norfloxacin (7) and colistin (8). The channel-former gramicidin-D (9), the carrier valinomycin (10), and the detergent triton X-100 (11) served as controls for ion transport. Reserpine (12) and CCCP (13) are known efflux pump inhibitors. Dansyl C<sub>14</sub> hydraphile (14) was synthesized to study localization of hydraphiles in bacteria.

**Table S1:** MIC of benzyl C<sub>8</sub>-C<sub>14</sub> hydraphiles (**1** - **4**) against efflux pump expressing tet<sup>R</sup> *E. coli*, *K. pneumoniae* (ATCC BAA 2146<sup>TM</sup>), and *S. aureus* 1199B.

| <b>Table S1: MIC in <math>\mu</math>M</b>      |                                                              |                                             |                                   |
|------------------------------------------------|--------------------------------------------------------------|---------------------------------------------|-----------------------------------|
| <b>Compounds used</b>                          | <b><i>K. pneumoniae</i><br/>(ATCC BAA 2146<sup>TM</sup>)</b> | <b><i>E. coli</i><br/>(tet<sup>R</sup>)</b> | <b><i>S. aureus</i><br/>1199B</b> |
| Benzyl C <sub>8</sub> hydraphile ( <b>1</b> )  | 200                                                          | 250                                         | 128                               |
| Benzyl C <sub>10</sub> hydraphile ( <b>2</b> ) | 56                                                           | 35                                          | 16                                |
| Benzyl C <sub>12</sub> hydraphile ( <b>3</b> ) | 35                                                           | 5                                           | 1                                 |
| Benzyl C <sub>14</sub> hydraphile ( <b>4</b> ) | 10                                                           | 2                                           | ≤1                                |
| Tetracycline ( <b>5</b> )                      | 1000                                                         | 900                                         | N.D.                              |
| Ciprofloxacin ( <b>6</b> )                     | 700                                                          | 0.5                                         | N.D.                              |
| Norfloxacin ( <b>7</b> )                       | N.D.                                                         | N.D.                                        | 64                                |
| Colistin ( <b>8</b> )                          | 0.25                                                         | 0.25                                        | N.D.                              |
| CCCP ( <b>13</b> )                             | N.D.                                                         | 56                                          | N.D.                              |
| Reserpine ( <b>12</b> )                        | >128                                                         | >128                                        | >128                              |

N.D. = not determined; Colistin is inactive against *S. aureus*

**Figure S2:** Combination of benzyl C<sub>8</sub>-C<sub>10</sub> hydrophile (1-2) and tetracycline or norfloxacin against tet<sup>R</sup> *E. coli*, *K. pneumoniae* and *S. aureus* 1199B.

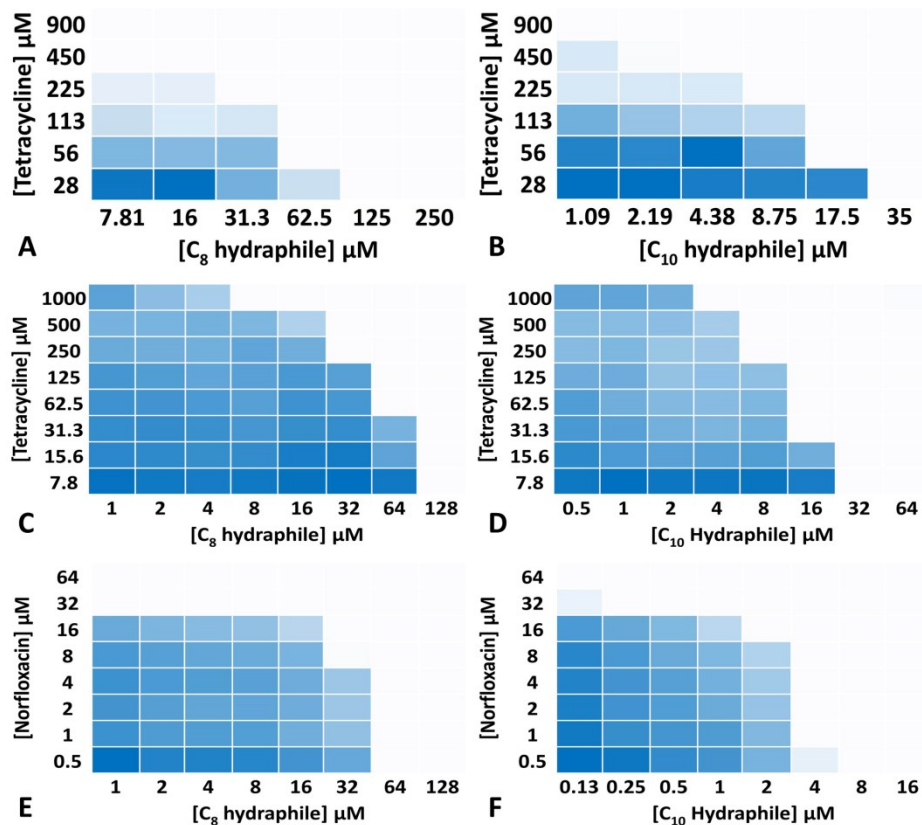

**Figure S2.** Checkerboard experiments with 1-2 (a-b) with tetracycline against tet<sup>R</sup> *E. coli*; (c-d) with tetracycline against *K. pneumoniae* (e-f) with norfloxacin against *S. aureus* 1199B. Color change from blue (0% inhibition) to white (>90% inhibition) indicates increasing growth inhibition.

**Figure S3:** Tet<sup>R</sup> *E. coli* growth curve with benzyl C<sub>8</sub>-C<sub>14</sub> hydraphile (1-4), tetracycline (5) and their combination.

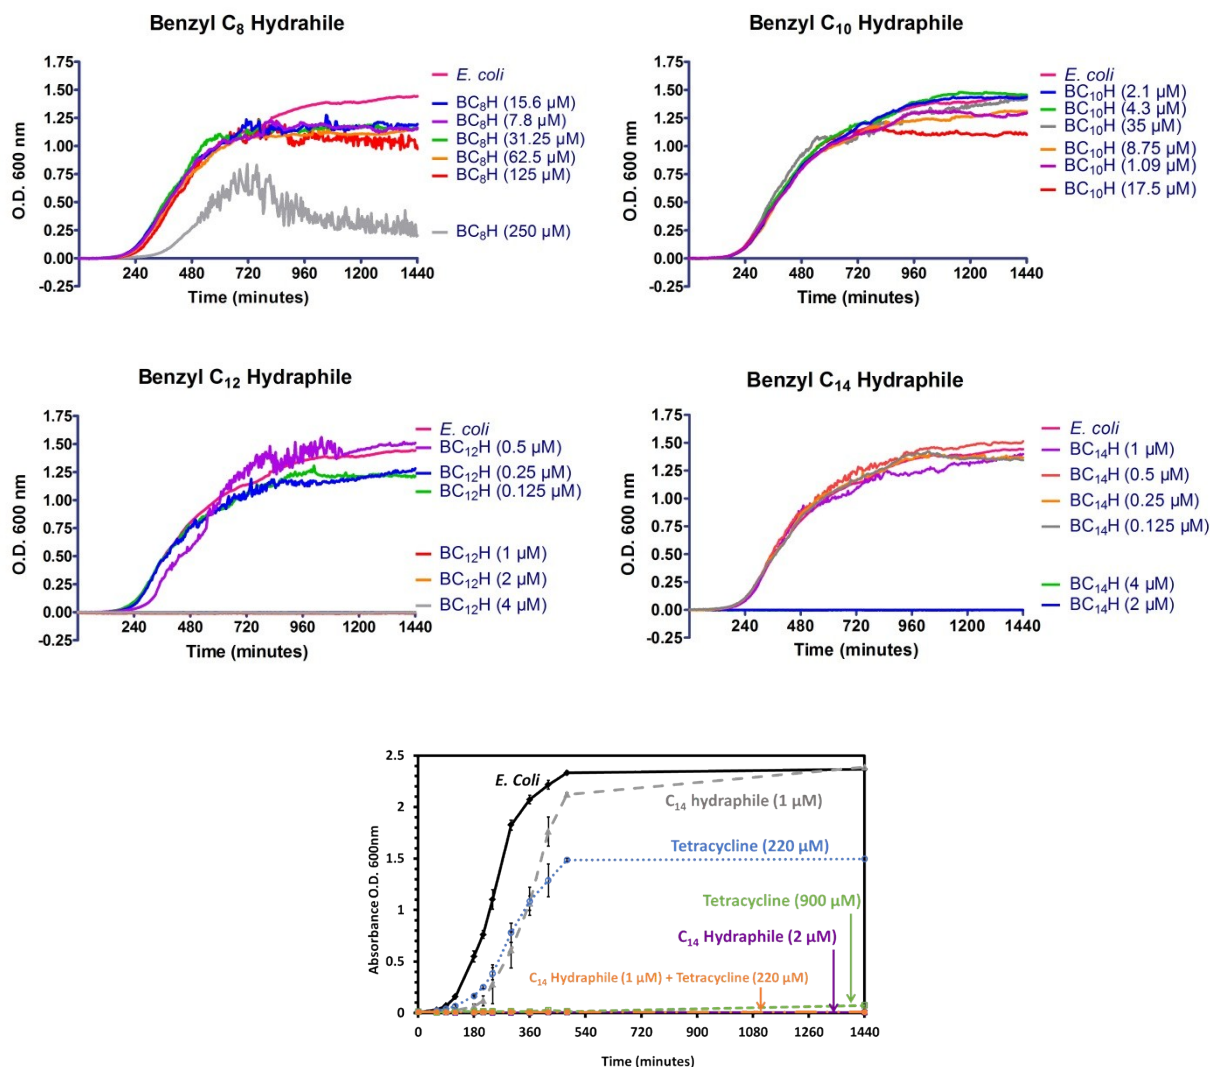

**Figure S3.** Growth of Tet<sup>R</sup> *E. coli* in the presence MIC, and fractional MICs of Benzyl C<sub>8</sub>-C<sub>14</sub> Hydraphile (1-4) over 24 hours (Four graphs on the top). Readings were taken every 4 minute, average of 2 trials was plotted and error bars were omitted for clarity.

Bottom graph shows the growth of Tet<sup>R</sup> *E. coli* in the presence of 1 μM (dashed grey line) and 2 μM (solid purple) benzyl C<sub>14</sub> hydraphile, 220 μM (dotted blue line) and 900 μM (dashed green line), and combination of 1 μM C<sub>14</sub> hydraphile and 220 μM tetracycline (orange line). The data represents average optical density (600 nm) from three separate trials. The error bars represent standard deviation in the results.

**Table S2:** Recovery of tetracycline, ampicillin and ciprofloxacin activity against *Klebsiella pneumoniae* by benzyl C<sub>8</sub>-C<sub>14</sub> hydraphiles.

| <b>Table S2: Benzyl C<sub>8</sub>-C<sub>14</sub> hydraphiles recover antibiotic potency against <i>K. pneumoniae</i>.</b> |                                              |                                              |                         |                  |
|---------------------------------------------------------------------------------------------------------------------------|----------------------------------------------|----------------------------------------------|-------------------------|------------------|
| <b>Amphiphile used</b>                                                                                                    | <b>[Amphiphile] <math>\mu\text{M}</math></b> | <b>[Antibiotic] <math>\mu\text{M}</math></b> | <b>Fold enhancement</b> | <b>FIC index</b> |
| <b>Antibiotic used: Tetracycline</b>                                                                                      |                                              |                                              |                         |                  |
| No amphiphile                                                                                                             | -                                            | 1000 $\pm$ 100                               | n/a                     | n/a              |
| Benzyl C <sub>8</sub> hydraphile                                                                                          | 2.5                                          | 1000 $\pm$ 100                               | 1-fold                  | 1                |
| Benzyl C <sub>8</sub> hydraphile                                                                                          | 50 ( $\frac{1}{4}$ MIC)                      | 250 $\pm$ 50                                 | 4-fold                  | 0.5              |
| Benzyl C <sub>8</sub> hydraphile                                                                                          | 100 ( $\frac{1}{2}$ MIC)                     | 25 $\pm$ 10                                  | 40-fold                 | 0.53             |
| Benzyl C <sub>10</sub> hydraphile                                                                                         | 2.5                                          | 900 $\pm$ 100                                | 1.1-fold                | 1                |
| Benzyl C <sub>10</sub> hydraphile                                                                                         | 14 ( $\frac{1}{4}$ MIC)                      | 300 $\pm$ 50                                 | 3-fold                  | 0.58             |
| Benzyl C <sub>10</sub> hydraphile                                                                                         | 28 ( $\frac{1}{2}$ MIC)                      | 125 $\pm$ 25                                 | 8-fold                  | 0.63             |
| Benzyl C <sub>12</sub> hydraphile                                                                                         | 2.5                                          | 500 $\pm$ 50                                 | 2-fold                  | 0.57             |
| Benzyl C <sub>12</sub> hydraphile                                                                                         | 8.75 ( $\frac{1}{4}$ MIC)                    | 300 $\pm$ 25                                 | 3-fold                  | 0.58             |
| Benzyl C <sub>12</sub> hydraphile                                                                                         | 17.5 ( $\frac{1}{2}$ MIC)                    | 125 $\pm$ 25                                 | 8-fold                  | 0.63             |
| Benzyl C <sub>14</sub> hydraphile                                                                                         | 2.5 ( $\frac{1}{4}$ MIC)                     | 350 $\pm$ 50                                 | 3-fold                  | 0.58             |
| Benzyl C <sub>14</sub> hydraphile                                                                                         | 5 ( $\frac{1}{2}$ [MIC])                     | 62.5 $\pm$ 25                                | 16-fold                 | 0.56             |
| <b>Antibiotic used: Ampicillin (beta-lactamase)</b>                                                                       |                                              |                                              |                         |                  |
| Benzyl C <sub>14</sub> hydraphile                                                                                         | 5 ( $\frac{1}{2}$ MIC)                       | > 1000                                       | 0-fold                  | n/a              |
| <b>Antibiotic used: Ciprofloxacin</b>                                                                                     |                                              |                                              |                         |                  |
| No amphiphile                                                                                                             | -                                            | 700 $\pm$ 100                                | n/a                     | n/a              |
| Benzyl C <sub>8</sub> hydraphile                                                                                          | 100 ( $\frac{1}{2}$ MIC)                     | 70 $\pm$ 20                                  | 10-fold                 | 0.6              |
| Benzyl C <sub>12</sub> hydraphile                                                                                         | 8.75 ( $\frac{1}{4}$ MIC)                    | 300 $\pm$ 25                                 | 2-fold                  | 0.67             |
| Benzyl C <sub>12</sub> hydraphile                                                                                         | 17.5 ( $\frac{1}{2}$ MIC)                    | 175 $\pm$ 25                                 | 4-fold                  | 0.75             |
| Benzyl C <sub>14</sub> hydraphile                                                                                         | 2.5 ( $\frac{1}{4}$ MIC)                     | 400 $\pm$ 50                                 | 2-fold                  | 0.82             |
| Benzyl C <sub>14</sub> hydraphile                                                                                         | 5 ( $\frac{1}{2}$ MIC)                       | 250 $\pm$ 25                                 | 3-fold                  | 0.85             |

**Table S3:** Recovery of tetracycline activity against tet<sup>R</sup> *E. coli* by gramicidin-D, valinomycin, triton X-100, CCCP, reserpine, and colistin.

| <b>Table S3: Combination studies with controls against Tet<sup>R</sup> <i>E. coli</i></b> |                                       |                                         |                         |                  |
|-------------------------------------------------------------------------------------------|---------------------------------------|-----------------------------------------|-------------------------|------------------|
| <b>Amphiphile used</b>                                                                    | <b>[Amphiphile] <math>\mu</math>M</b> | <b>[Tetracycline] <math>\mu</math>M</b> | <b>Fold enhancement</b> | <b>FIC index</b> |
| No amphiphile                                                                             | -                                     | 900 $\pm$ 100                           | n/a                     |                  |
| CCCP                                                                                      | 1                                     | 900                                     | 1-fold                  | 1                |
| CCCP                                                                                      | 21                                    | 450                                     | 2-fold                  | 0.75             |
| CCCP                                                                                      | 42                                    | 225                                     | 4-fold                  | 0.75             |
| Reserpine                                                                                 | 64                                    | 450                                     | 2-fold                  | 1                |
| Reserpine                                                                                 | 128                                   | 225                                     | 4-fold                  | 1                |
| Colistin                                                                                  | 0.03125                               | 225                                     | 4-fold                  | 0.52             |
| Colistin                                                                                  | 0.0625                                | 56.25                                   | 16-fold                 | 0.31             |
| Gramicidin-D                                                                              | 20                                    | 900 $\pm$ 100                           | 1-fold                  | 1                |
| Valinomycin                                                                               | 20                                    | 450 $\pm$ 100                           | 2-fold                  | 1                |
| Triton X-100                                                                              | 20                                    | 450 $\pm$ 100                           | 2-fold                  | 1                |
| Triton X-100                                                                              | 1700 (0.1%)                           | 450 $\pm$ 100                           | 2-fold                  | 1                |
| Colistin                                                                                  | 0.0625                                | 56.25                                   | 16-fold                 | 0.8              |
| Colistin                                                                                  | 0.03125                               | 225                                     | 4-fold                  | 0.5              |
| Colistin                                                                                  | 0.0156                                | 450                                     | 2-fold                  | 0.6              |

**Figure S4:** Scanning electron micrographs of tet<sup>R</sup> *E. coli* treated with benzyl C<sub>14</sub> hydraphile.

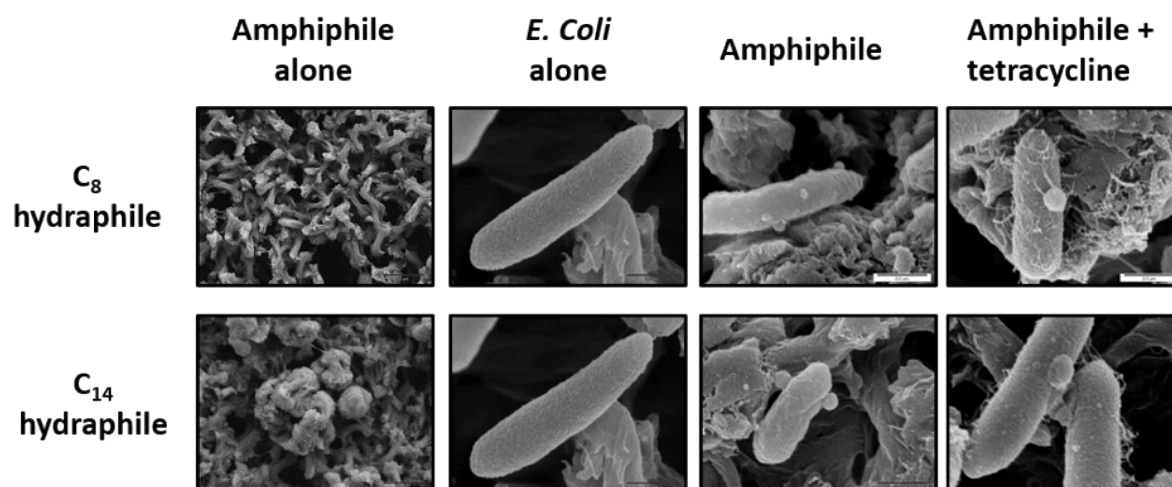

**Figure S4.** Scanning electron microscopy images of tet<sup>R</sup> *E. coli* treated with benzyl C<sub>8</sub> hydraphile (top panel, scale = 0.5 μm) and benzyl C<sub>14</sub> hydraphile (bottom panel, scale = 0.5 μm). The column labeled ‘amphiphiles alone’ shows the nylon membrane (top, scale = 2 μm) and benzyl C<sub>14</sub> hydraphile aggregate (bottom, scale = 2 μm).



**Figure S5:** Localization of dansyl labeled C<sub>14</sub> hydrophile in human embryonic kidney (HEK-293) cells.

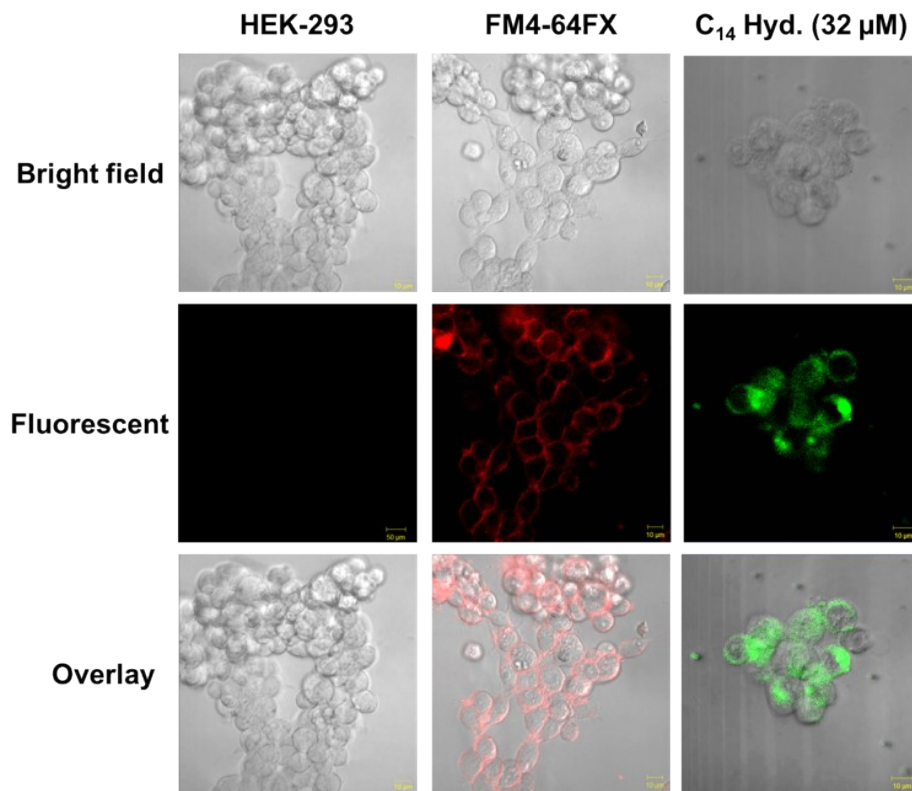

**Figure S5.** Localization of FM4-64FX (red), and dansyl labeled C<sub>14</sub> hydrophile (green) in mammalian cells. The magnification is 400-X and the scale is 10 μm.

**Figure S6:** Change in membrane permeability of tet<sup>R</sup> *E. coli* and *S. aureus* 1199B in the presence of compounds 1-4, triton X-100 and colistin.

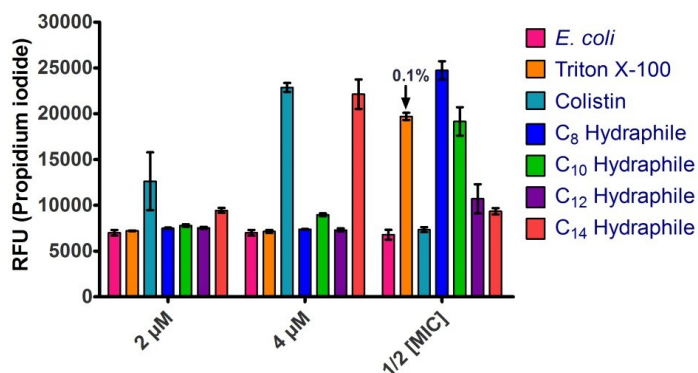

**Figure S6a.** Permeability of propidium iodide to *E. coli* cell membranes mediated by compounds 1-4, triton X-100 and colistin. The X-axis represents the concentration of the compounds used whereas the y-axis represents the relative fluorescence unit (RFU). Error bars represent standard deviation in three trials.

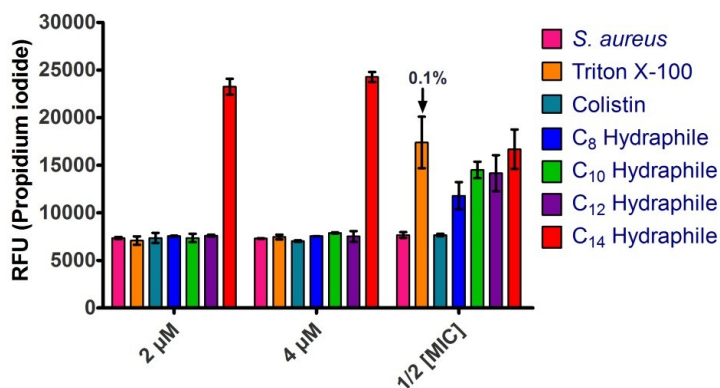

**Figure S6b.** Permeability of propidium iodide to *S. aureus* cell membranes mediated by compounds 1-4, triton X-100 and colistin. The X-axis represents the concentration of the compounds used whereas the y-axis represents the relative fluorescence unit (RFU). Error bars represent standard deviation in three trials.

**Figure S7.** Confocal images showing permeability of PI and FDA in tet<sup>R</sup> *E. coli* and HEK-293 cells mediated by compounds 1-4 and triton X-100.

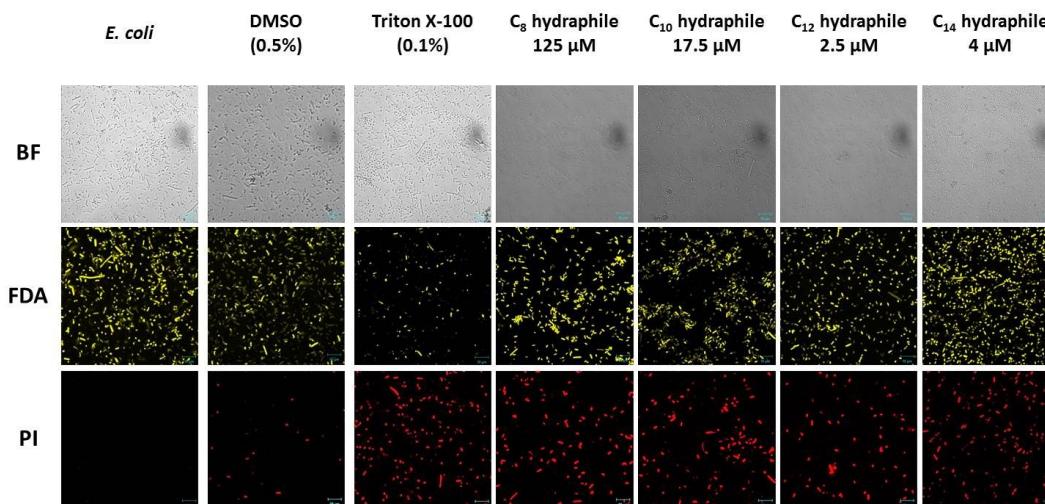

**Figure S7a.** Benzyl C<sub>8</sub>-C<sub>14</sub> hydraphiles (<sup>1</sup>/<sub>2</sub> [MIC]) mediated permeability of propidium iodide and fluorescein diacetate in tet<sup>R</sup> *E. coli*. *E. coli* alone, DMSO (0.5% v/v) and triton X-100 (0.1% v/v) were used as controls.

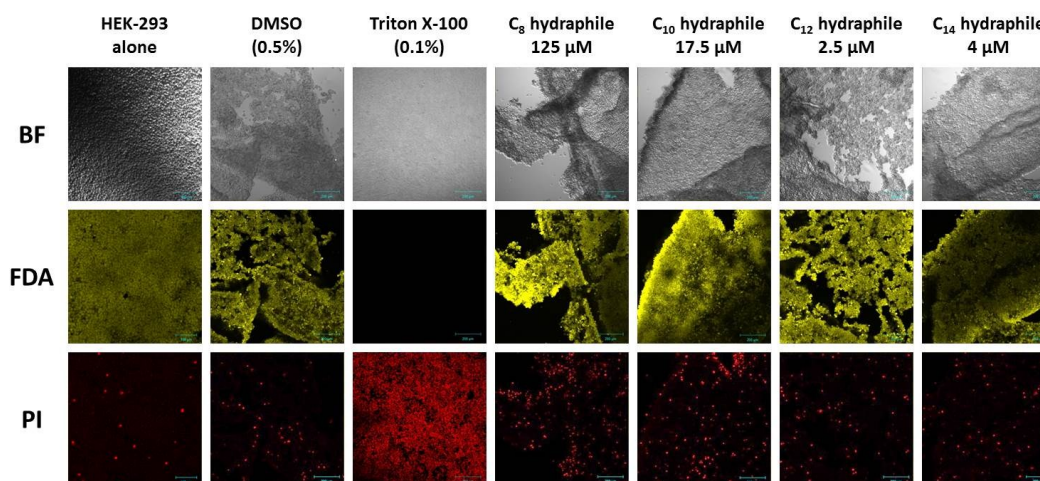

**Figure S7b.** Benzyl C<sub>8</sub>-C<sub>14</sub> hydraphiles (<sup>1</sup>/<sub>2</sub> [MIC]) mediated permeability of propidium iodide and fluorescein diacetate in HEK-293 cells. HEK-293 alone, DMSO (0.5%) and triton X-100 (0.1%) were used as controls.

**Figure S8:** Release of potassium ions from tet<sup>R</sup> *E. coli* in the presence of benzyl C<sub>8</sub>-C<sub>14</sub> hydraphiles and Gramicidin.

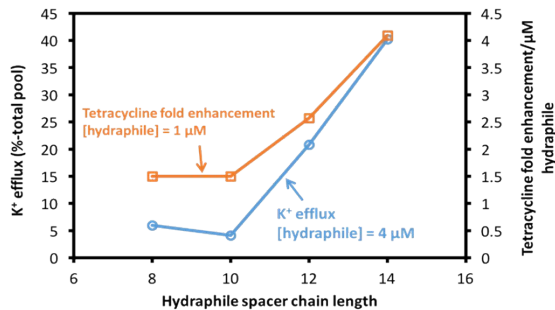

**Figure S8(a).** Comparison of benzyl C<sub>8</sub>-C<sub>14</sub> hydraphiles to transport potassium ions (open circles) and recovery of tetracycline activity (open squares) against tet<sup>R</sup> *E. coli*. Potassium release is expressed in percent of total potassium content of tet<sup>R</sup> *E. coli* released (y-axis, left) and tetracycline recovery in fold enhancement (y-axis, right). The x-axis shows the number of carbon atoms in the spacer chains of hydraphiles.

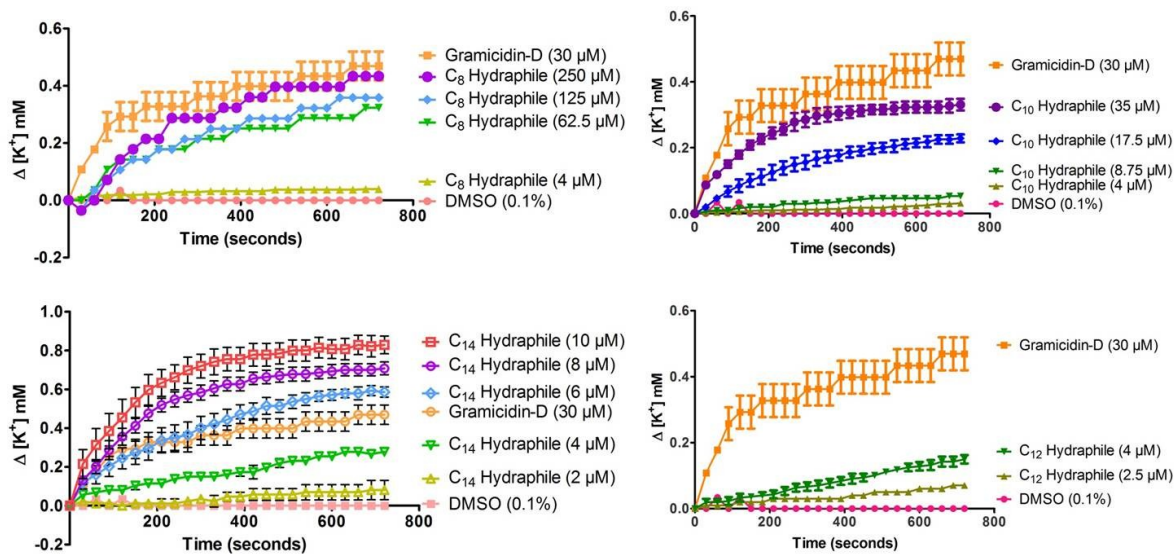

**Figure S8 (b-e).** Potassium release from *E. coli* over 720 seconds in the presence of various concentrations of benzyl C<sub>8</sub> hydraphile (a), benzyl C<sub>10</sub> hydraphile (b), benzyl C<sub>14</sub> hydraphile (c), and benzyl C<sub>12</sub> hydraphile (d). Error bars represent standard deviation in three trials.

**Table S4.** Combination studies with hydraphiles and ethidium bromide against *S. aureus* 1199B.

| <b>Table S4.</b> Recovery of ethidium bromide activity against <i>S. aureus</i> 1199B |                                              |                                         |                         |
|---------------------------------------------------------------------------------------|----------------------------------------------|-----------------------------------------|-------------------------|
| <b>Amphiphile used</b>                                                                | <b>[Amphiphile] <math>\mu\text{M}</math></b> | <b>[EthBr] <math>\mu\text{M}</math></b> | <b>Fold enhancement</b> |
| No amphiphile                                                                         | -                                            | 16                                      | n/a                     |
| C <sub>8</sub> hydraphile                                                             | 32 ( $\frac{1}{4}$ MIC)                      | 16                                      | 1-fold                  |
| C <sub>8</sub> hydraphile                                                             | 64 ( $\frac{1}{2}$ MIC)                      | 8                                       | 2-fold                  |
| C <sub>10</sub> hydraphile                                                            | 4 ( $\frac{1}{4}$ MIC)                       | 16                                      | 1-fold                  |
| C <sub>10</sub> hydraphile                                                            | 8 ( $\frac{1}{2}$ MIC)                       | 1                                       | 16-fold                 |
| C <sub>12</sub> hydraphile                                                            | 0.25 ( $\frac{1}{4}$ MIC)                    | 16                                      | 1-fold                  |
| C <sub>12</sub> hydraphile                                                            | 0.5 ( $\frac{1}{2}$ MIC)                     | 2                                       | 8-fold                  |
| C <sub>14</sub> hydraphile                                                            | 0.25 ( $\frac{1}{4}$ MIC)                    | 4                                       | 4-fold                  |
| C <sub>14</sub> hydraphile                                                            | 0.5 ( $\frac{1}{2}$ MIC)                     | 0.5                                     | 32-fold                 |

**Figure S9:** Survival of human hepatocytes in the presence of 1-100  $\mu\text{M}$  benzyl  $\text{C}_{14}$  hydrophile and CCCP.

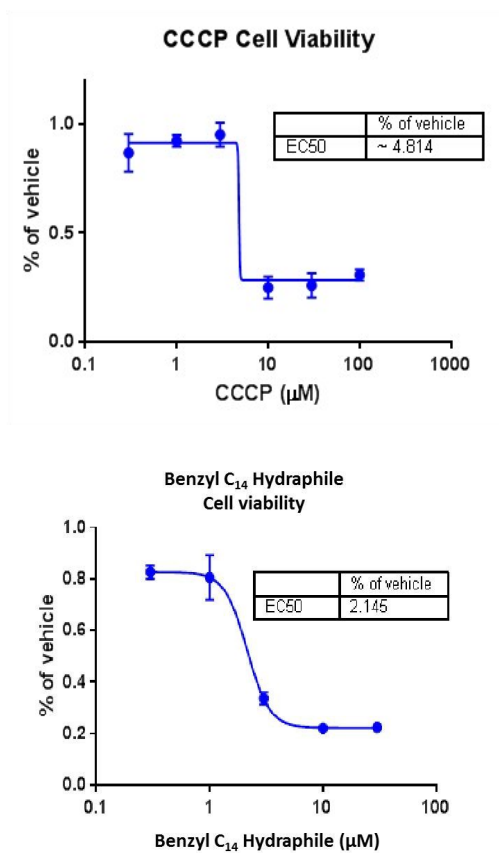

**Figure S9.** Cytotoxicity of benzyl  $\text{C}_{14}$  hydrophile and CCCP at 1-100  $\mu\text{M}$  against human hepatocytes. The x-axis represents the concentration of the compound used. The y-axis represents the percent of cells survived as compared to the vehicle (DMSO) in the presence of the respective compounds used. The error bars represent standard deviation in three trials.
